# Supplementary material
Source: PubMed Central journal article supplement (PMC3358249)
Supplement: supp_blood-2011-12-398024_blood-2011-12-398024-1.pdf [file supp_blood-2011-12-398024_blood-2011-12-398024-1.pdf]

**Supplementary Table S1A: Frequency of platelet producing cells in Lin<sup>-</sup>ALDH<sup>+</sup> CB at different time points post-transplant**

| CB unit                     | Dose  | # Positive/Total mice             |                                    |                                    |                                    |
|-----------------------------|-------|-----------------------------------|------------------------------------|------------------------------------|------------------------------------|
|                             |       | Week 3                            | Week 6                             | Week 13                            | Week 20                            |
| 1                           | 1000  | 2/2                               | 1/2                                | 1/2                                | 2/2                                |
|                             | 5000  | 2/2                               | 1/2                                | 1/2                                | 1/1                                |
| 2                           | 1000  | 0/2                               | 0/2                                | 1/2                                | 2/2                                |
|                             | 5000  | 2/2                               | 2/2                                | 2/2                                | 2/2                                |
| 3                           | 5000  | 4/4                               | 3/3                                | 3/3                                | 3/3                                |
| 4                           | 250   | 1/4                               | 0/4                                | 1/4                                | 1/4                                |
|                             | 750   | 6/9                               | 1/9                                | 5/9                                | 1/9                                |
|                             | 2500  | 4/7                               | 5/7                                | 5/7                                | 6/7                                |
|                             | 6000  | 3/3                               | 2/3                                | 3/3                                |                                    |
| 5                           | 13000 | 3/3                               | 3/3                                | 3/3                                |                                    |
|                             | 4000  | 3/3                               | 2/3                                |                                    |                                    |
| 6                           | 1000  | 2/3                               | 3/3                                | 2/3                                | 2/3                                |
|                             | 5000  | 2/2                               | 2/2                                | 2/2                                | 2/2                                |
|                             | 10000 | 3/3                               | 3/3                                | 2/2                                | 2/2                                |
| 7                           | 5000  | 4/4                               | 2/4                                | 2/4                                | 2/4                                |
| Overall frequency<br>95% CI |       | 1 in 1255<br>1 in 1970 - 1 in 799 | 1 in 2984<br>1 in 4523 - 1 in 1968 | 1 in 1993<br>1 in 3105 - 1 in 1279 | 1 in 1836<br>1 in 2939 - 1 in 1146 |

CI: Confidence interval

**Supplementary Table S1B: Frequency of platelet producing cells in Lin<sup>-</sup>ALDH<sup>+</sup> mPB at different time points post-transplant**

| mPB unit          | Dose  | # Positive/Total mice |                        |               |               |
|-------------------|-------|-----------------------|------------------------|---------------|---------------|
|                   |       | Week 3                | Week 6                 | Week 13       | Week 20       |
| 1                 | 1000  | 3/3                   | 2/2                    | 0/2           | 0/2           |
|                   | 5000  | 3/3                   | 2/3                    | 0/3           | 0/3           |
| 2                 | 2000  | 8/8                   | 6/8                    | 0/8           | 0/8           |
|                   | 4200  | 2/2                   | 0/2                    | 0/2           | 0/2           |
| 3                 | 4750  | 1/2                   | 0/2                    | 0/2           | 0/1           |
|                   | 670   | 1/3                   | 1/3                    | 0/3           | 0/3           |
| 4                 | 10000 | 1/2                   | 1/2                    | 0/2           | 0/2           |
|                   | 12000 | 3/3                   | 1/3                    | 0/3           | 0/2           |
| 5                 | 46000 | 3/3                   | 3/3                    | 0/2           | 0/2           |
|                   | 1000  | 0/2                   | 0/2                    | 0/2           |               |
| 6                 | 3000  | 1/3                   | 0/3                    | 0/3           |               |
|                   | 9000  | 0/2                   | 0/2                    | 0/2           |               |
| Overall frequency |       | 1 in 3246             | 1 in 8530              | < 1 in 229910 | < 1 in 200910 |
| 95% CI            |       | 1 in 5422 - 1 in 1944 | 1 in 15465 - 1 in 4704 |               |               |

CI: Confidence interval

**Supplementary Table S1C: Frequency of neutrophil producing cells in Lin<sup>-</sup>ALDH<sup>+</sup> CB at different time points post-transplant**

| CB unit                     | Dose  | # Positive/Total mice            |                                    |                                  |                                  |
|-----------------------------|-------|----------------------------------|------------------------------------|----------------------------------|----------------------------------|
|                             |       | Week 3                           | Week 6                             | Week 13                          | Week 20                          |
| 1                           | 1000  | 2/2                              | 2/2                                | 2/2                              | 2/2                              |
|                             | 5000  | 2/2                              | 2/2                                | 2/2                              | 2/2                              |
| 2                           | 1000  | 2/2                              | 1/2                                | 2/2                              | 2/2                              |
|                             | 5000  | 2/2                              | 2/2                                | 2/2                              | 2/2                              |
| 3                           | 5000  |                                  | 3/3                                | 3/3                              | 3/3                              |
| 4                           | 250   | 1/4                              | 0/4                                | 1/4                              | 3/4                              |
|                             | 750   | 6/9                              | 4/9                                | 6/9                              | 7/9                              |
|                             | 2500  | 6/7                              | 5/7                                | 6/7                              | 7/7                              |
|                             | 6000  | 3/3                              | 3/3                                | 3/3                              |                                  |
|                             | 13000 | 3/3                              | 3/3                                | 3/3                              |                                  |
| 5                           | 4000  | 3/3                              | 3/3                                |                                  |                                  |
| 6                           | 1000  | 2/3                              | 2/3                                | 3/3                              | 3/3                              |
|                             | 5000  | 2/2                              | 2/2                                | 2/2                              | 2/2                              |
|                             | 10000 | 3/3                              | 2/3                                | 2/2                              | 2/2                              |
| 7                           | 5000  | 4/4                              | 4/4                                | 3/4                              | 3/4                              |
| Overall frequency<br>95% CI |       | 1 in 777<br>1 in 1292 - 1 in 468 | 1 in 1737<br>1 in 2668 - 1 in 1132 | 1 in 766<br>1 in 1340 - 1 in 438 | 1 in 737<br>1 in 1235 - 1 in 439 |

CI: Confidence interval

**Supplementary Table S1D: Frequency of neutrophil producing cells in Lin<sup>-</sup>ALDH<sup>+</sup> mPB at different time points post-transplant**

| mPB unit          | Dose  | # Positive/Total mice |                        |                         |                        |
|-------------------|-------|-----------------------|------------------------|-------------------------|------------------------|
|                   |       | Week 3                | Week 6                 | Week 13                 | Week 20                |
| 1                 | 1000  | 3/3                   | 2/2                    | 0/2                     | 1/1                    |
|                   | 5000  | 3/3                   | 3/3                    | 1/3                     | 1/3                    |
| 2                 | 2000  | 8/8                   | 8/8                    | 4/8                     | 1/8                    |
|                   | 4200  | 2/2                   | 0/2                    | 0/2                     | 0/2                    |
| 3                 | 4750  | 2/2                   | 1/2                    | 0/2                     | 0/2                    |
|                   | 670   | 2/3                   | 1/3                    | 0/3                     | 0/3                    |
| 4                 | 10000 | 2/2                   | 1/2                    | 0/2                     | 0/2                    |
|                   | 12000 | 1/3                   | 0/3                    | 0/3                     | 0/2                    |
| 5                 | 46000 | 3/3                   | 3/3                    | 1/2                     | 2/2                    |
|                   | 1000  | 0/2                   | 0/2                    | 0/2                     |                        |
| 6                 | 3000  | 0/3                   | 0/3                    | 0/3                     |                        |
|                   | 9000  | 0/2                   | 1/2                    | 0/2                     |                        |
| Overall frequency |       | 1 in 3707             | 1 in 6176              | 1 in 32509              | 1 in 24876             |
| 95% CI            |       | 1 in 6217 - 1 in 2211 | 1 in 10788 - 1 in 3536 | 1 in 77627 - 1 in 13614 | 1 in 61921 - 1 in 9994 |

CI: Confidence interval

**Supplementary Table S2: Calculated number of 3-week NSG platelet and neutrophil producing cells in 42 individual mPB samples**

| Sample ID | Transplant cell dose/kg weight in patient |                                     | Days to recovery |            | Measured week 3 output                   |                            | Cal. no. of week 3 producing cells per $2 \times 10^5$ CD34 <sup>+</sup> cells |            |
|-----------|-------------------------------------------|-------------------------------------|------------------|------------|------------------------------------------|----------------------------|--------------------------------------------------------------------------------|------------|
|           | 34 <sup>+</sup> x10 <sup>8</sup>          | ALDH <sup>+</sup> x 10 <sup>6</sup> | Platelet         | Neutrophil | Platelet (x10 <sup>3</sup> )/ml mouse PB | Neutrophil (%) in mouse BM | Platelet                                                                       | Neutrophil |
| 1         | 0.08                                      | 0.18                                | 34               | 25         | 1300                                     | 11                         | 21                                                                             | 37         |
| 2         | 0.03                                      | 0.09                                | 22               | 10         | 36                                       | 0.2                        | 0.59                                                                           | 0.66       |
| 3         | 0.07                                      | 0.41                                | 21               | 10         | 81                                       | 0.57                       | 1.3                                                                            | 1.8        |
| 4         | 0.03                                      | 0.19                                | 19               | 11         | 36                                       | 0.05                       | 0.59                                                                           | 0.15       |
| 5         | 0.06                                      | 0.25                                | 19               | 11         | 10                                       | 0.05                       | 0.17                                                                           | 0.17       |
| 6         | 0.03                                      | 0.37                                | 18               | 11         | 49                                       | 0.4                        | 0.81                                                                           | 1.3        |
| 7         | 0.04                                      | 0.02                                | 17               | 11         | 55                                       | 0.04                       | 0.91                                                                           | 0.11       |
| 8         | 0.04                                      | 0.55                                | 17               | 19         | 170                                      | 5.1                        | 2.8                                                                            | 17         |
| 9         | 0.06                                      | 0.17                                | 16               | 10         | 71                                       | 0.05                       | 1.2                                                                            | 0.17       |
| 10        | 0.07                                      | 1.1                                 | 16               | 10         | 250                                      | 5.7                        | 4.1                                                                            | 18         |
| 11        | 0.03                                      | 0.04                                | 15               | 11         | 31                                       | 0.04                       | 0.52                                                                           | 0.11       |
| 12        | 0.07                                      | 0.45                                | 15               | 11         | 36                                       | 0.86                       | 0.59                                                                           | 2.8        |
| 13        | 0.1                                       | 0.64                                | 15               | 11         | 30                                       | 0.2                        | 0.49                                                                           | 0.65       |
| 14        | 0.02                                      | 0.07                                | 14               | 14         | 490                                      | 9.5                        | 8.1                                                                            | 31         |
| 15        | 0.25                                      | 6.5                                 | 13               | 9          | 3200                                     | 13                         | 53                                                                             | 40         |
| 16        | 0.07                                      | 1.5                                 | 13               | 12         | 21000                                    | 8.6                        | 350                                                                            | 28         |
| 17        | 0.06                                      | 0.18                                | 13               | 10         | 58                                       | 3.1                        | 0.96                                                                           | 10         |
| 18        | 0.1                                       | 0.54                                | 13               | 10         | 170                                      | 3.6                        | 2.8                                                                            | 12         |
| 19        | 0.21                                      | 3.1                                 | 12               | 13         | 3700                                     | 16                         | 61                                                                             | 52         |
| 20        | 0.1                                       | 0.74                                | 12               | 9          | 990                                      | 3.6                        | 16                                                                             | 12         |
| 21        | 0.09                                      | 0.56                                | 12               | 14         | 8900                                     | 23                         | 150                                                                            | 73         |
| 22        | 0.07                                      | 2                                   | 12               | 11         | 670                                      | 10                         | 11                                                                             | 33         |
| 23        | 0.03                                      | 0.16                                | 12               | 15         | 69                                       | 0.37                       | 1.2                                                                            | 1.2        |
| 24        | 0.13                                      | 2                                   | 11               | 9          | 1900                                     | 12                         | 31                                                                             | 38         |
| 25        | 0.09                                      | 1.5                                 | 11               | 15         | 180                                      | 1.3                        | 2.9                                                                            | 4.3        |

**Cont. Supplementary Table S2**

| Sample ID | Transplant cell dose/kg weight in patient |                                     | Days to recovery |            | Measured week 3 output                   |                            | Cal. no. of week 3 producing cells per $2 \times 10^5$ CD34 <sup>+</sup> cells |            |
|-----------|-------------------------------------------|-------------------------------------|------------------|------------|------------------------------------------|----------------------------|--------------------------------------------------------------------------------|------------|
|           | 34 <sup>+</sup> x10 <sup>8</sup>          | ALDH <sup>+</sup> x 10 <sup>6</sup> | Platelet         | Neutrophil | Platelet (x10 <sup>3</sup> )/ml mouse PB | Neutrophil (%) in mouse BM | Platelet                                                                       | Neutrophil |
| 26        | 0.08                                      | 1.1                                 | 11               | 11         | 440                                      | 19                         | 7.2                                                                            | 61         |
| 27        | 0.04                                      | 0.18                                | 11               | 13         | 3400                                     | 9.3                        | 56                                                                             | 30         |
| 28        | 0.12                                      | 3.2                                 | 10               | 9          | 85                                       | 4.2                        | 1.4                                                                            | 13         |
| 29        | 0.1                                       | 1.6                                 | 10               | 16         | 460                                      | 6.8                        | 7.6                                                                            | 22         |
| 30        | 0.07                                      | 0.66                                | 10               | 11         | 82                                       | 1.4                        | 1.4                                                                            | 4.4        |
| 31        | 0.27                                      | 2                                   | 9                | 10         | 290                                      | 8.6                        | 4.8                                                                            | 28         |
| 32        | 0.26                                      | 2.3                                 | 9                | 12         | 91                                       | 1.9                        | 1.5                                                                            | 6.1        |
| 33        | 0.18                                      | 2.9                                 | 9                | 14         | 450                                      | 1.8                        | 7.4                                                                            | 5.8        |
| 34        | 0.16                                      | 3.6                                 | 9                | 12         | 1000                                     | 26                         | 17                                                                             | 84         |
| 35        | 0.13                                      | 0.81                                | 9                | 11         | 480                                      | 1.2                        | 8                                                                              | 3.9        |
| 36        | 0.44                                      | 7.5                                 | 8                | 10         | 1900                                     | 8.2                        | 32                                                                             | 26         |
| 37        | 0.44                                      | 12                                  | 8                | 10         | 68                                       | 0.15                       | 1.1                                                                            | 0.47       |
| 38        | 0.18                                      | 1.1                                 | 8                | 11         | 1200                                     | 4.6                        | 19                                                                             | 15         |
| 39        | 0.17                                      | 0.95                                | 8                | 21         | 1500                                     | 1.8                        | 25                                                                             | 5.8        |
| 40        | 0.04                                      | 0.3                                 | 8                | 11         | 64                                       | 0.03                       | 1.1                                                                            | 0.08       |
| 41        | 0.17                                      | 2.8                                 | 7                | 17         | 720                                      | 1                          | 12                                                                             | 3.2        |
| 42        | 0.13                                      | 1.6                                 | 6                | 10         | 250                                      | 0.56                       | 4                                                                              | 1.8        |

Cal. No.: Calculated number

Supplementary Figure S1

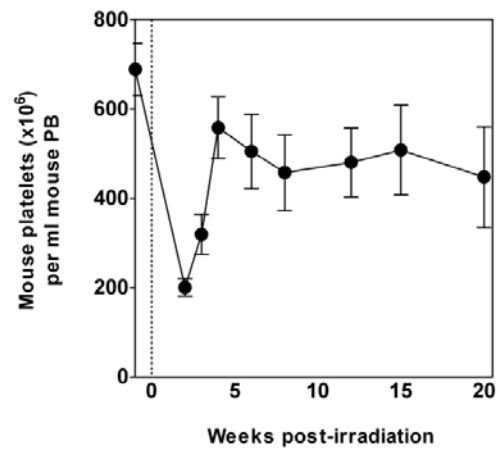

Supplementary Figure S2

A

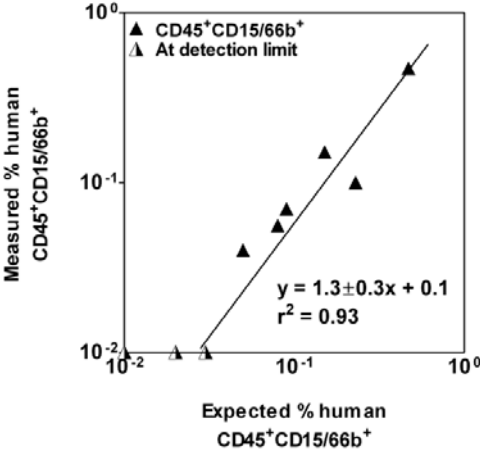

B

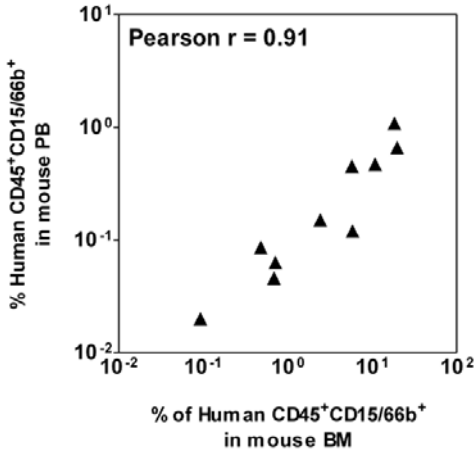



### Supplementary Figure S3

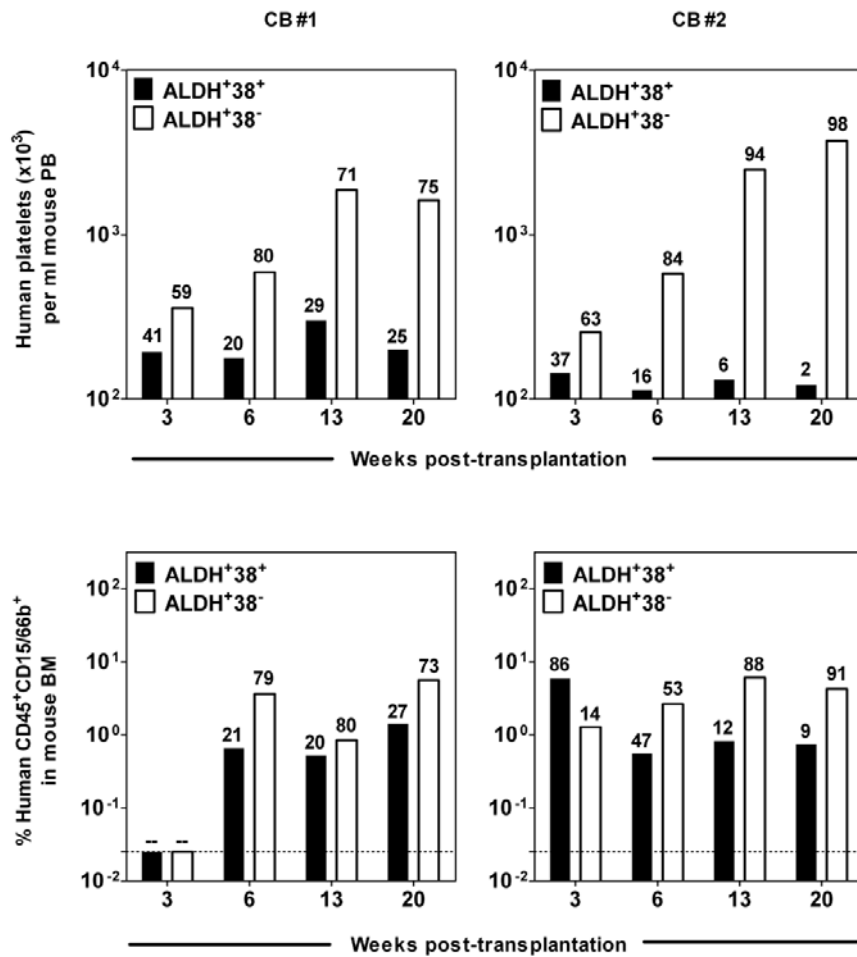

Supplementary Figure S4

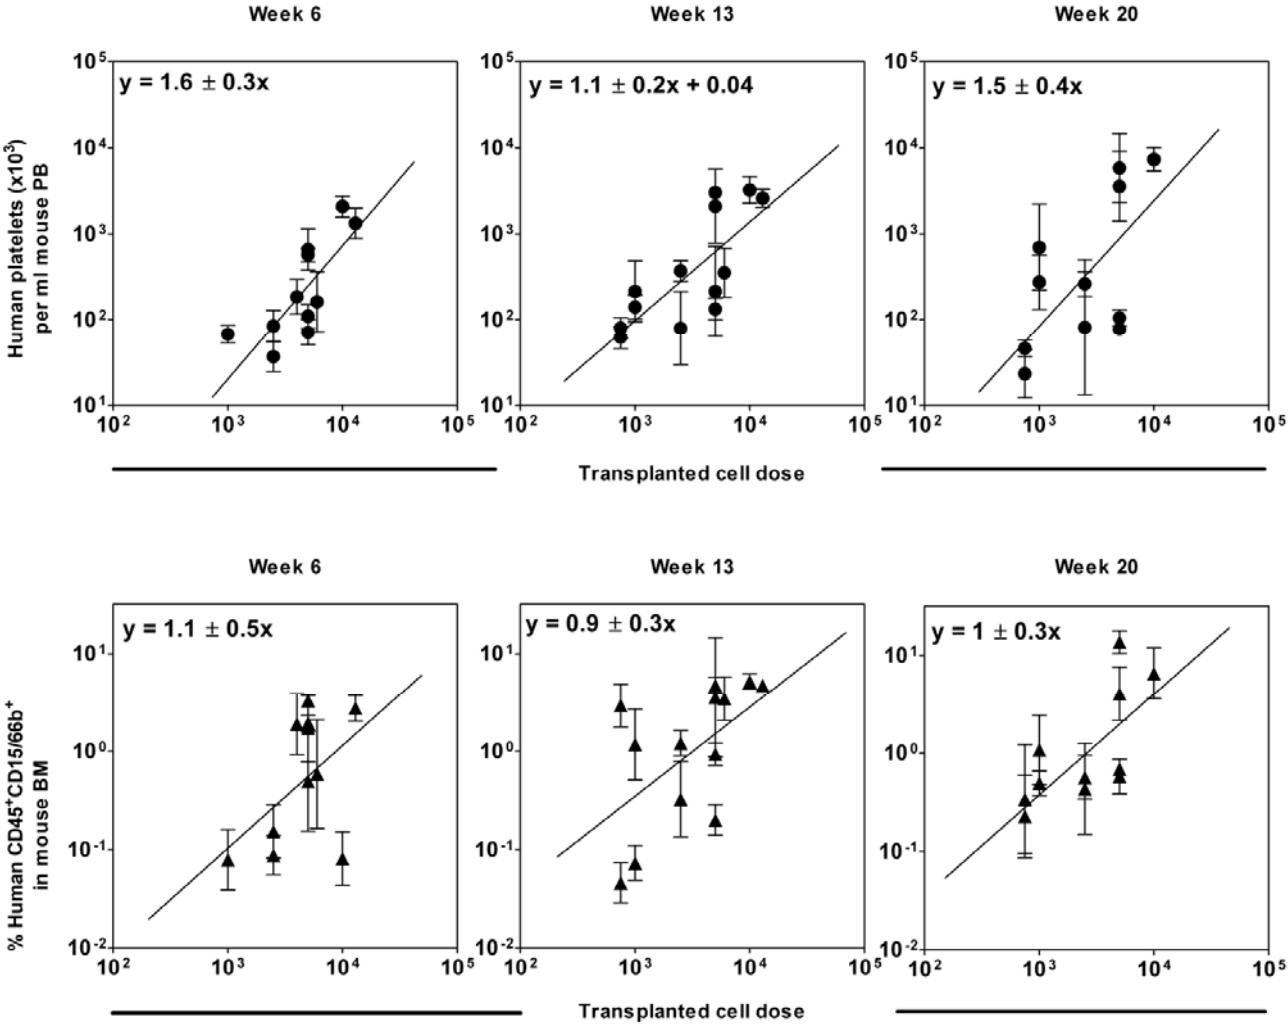

## **Supplementary Figure Legends**

*Supplementary Figure S1: Kinetics of circulating platelet levels after sublethal irradiation (315 cGy) of adult (6-10 week-old) NSG mice*

Starting values were measured one week before the irradiation. Values shown are the mean $\pm$ SEM of measurements on 8 mice tracked over 20 weeks.

*Supplementary Figure S2: Detection of human neutrophils in NSG mouse blood and BM*

(A) The minimum number of human CD45<sup>+</sup>CD15/66b<sup>+</sup> neutrophils detectable in mouse blood determined from an analysis of serial dilutions of human blood cells in undiluted mouse blood (= 0.01%). (B) Matching outputs of human neutrophils in the PB and BM of 10 individual mice expressed as a % of the total viable (PI<sup>-</sup>) nucleated cells (mouse and human) per ml PB or per femur. The calculated Pearson correlation coefficient shows a significant correlation between the values.

*Supplementary Figure S3: CB sample-specific differences in their phenotype distributions of cells that produce platelets and neutrophils for varying periods in NSG mice*

NSG mice were each transplanted with 4,000 Lin<sup>-</sup>ALDH<sup>+</sup>CD38<sup>+</sup> CB cells or the cells from the matching fraction of Lin<sup>-</sup>ALDH<sup>+</sup>CD38<sup>-</sup> cells of each of 2 separate CB samples and the numbers of human platelets in the PB (upper panels) or human neutrophils in the BM (lower

panels) were determined up to 20 weeks later. The number above each bar indicates the proportion of total platelet or neutrophil producing cell activities in that cell fraction. The dotted line in the lower panels indicates the limit of detection of human neutrophils in the BM.

*Supplementary Figure S4: Linear relationship between the dose of Lin<sup>-</sup>ALDH<sup>+</sup> CB cells transplanted and the level of human platelets and neutrophils detected up to 20 weeks later. Shown are the mean $\pm$ SEM of data pooled from 7 experiments (groups of 2-5 mice per cell dose per experiment).*
